# Supplementary material for: A mitotic kinase scaffold depleted in testicular seminomas impacts spindle orientation in germ line stem cells
Source: eLife journal article supplement (doi:10.7554/elife.09384), 2015-09-25
Supplement: supp [file elife-09384-supp-v1.zip]

Archive with 6 entries (6 files):
- elife_poa_e09384_Figure_6_figure_supplement_1.pdf
- elife_poa_e09384_Figure_1_figure_supplement_1.pdf
- elife_poa_e09384_Figure_2_figure_supplement_1.pdf
- elife_poa_e09384_Video_1.avi
- elife_poa_e09384_Figure_4_figure_supplement_1.pdf
- elife_poa_e09384_Video_2.avi
