# Supplementary figures and images for: A mitotic kinase scaffold depleted in testicular seminomas impacts spindle orientation in germ line stem cells
Source: eLife journal article supplement (doi:10.7554/elife.09384), 2015-09-25

**A**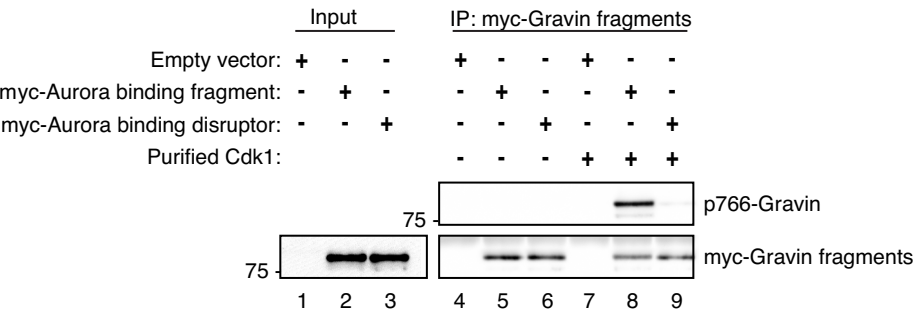**B**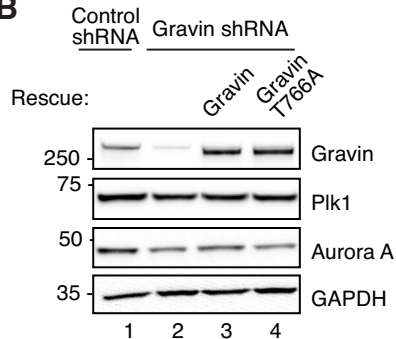

**Figure 6 - figure supplement 1**

Supplement: supp [file elife-09384-supp-v1.zip › elife_poa_e09384_Figure_6_figure_supplement_1.pdf]

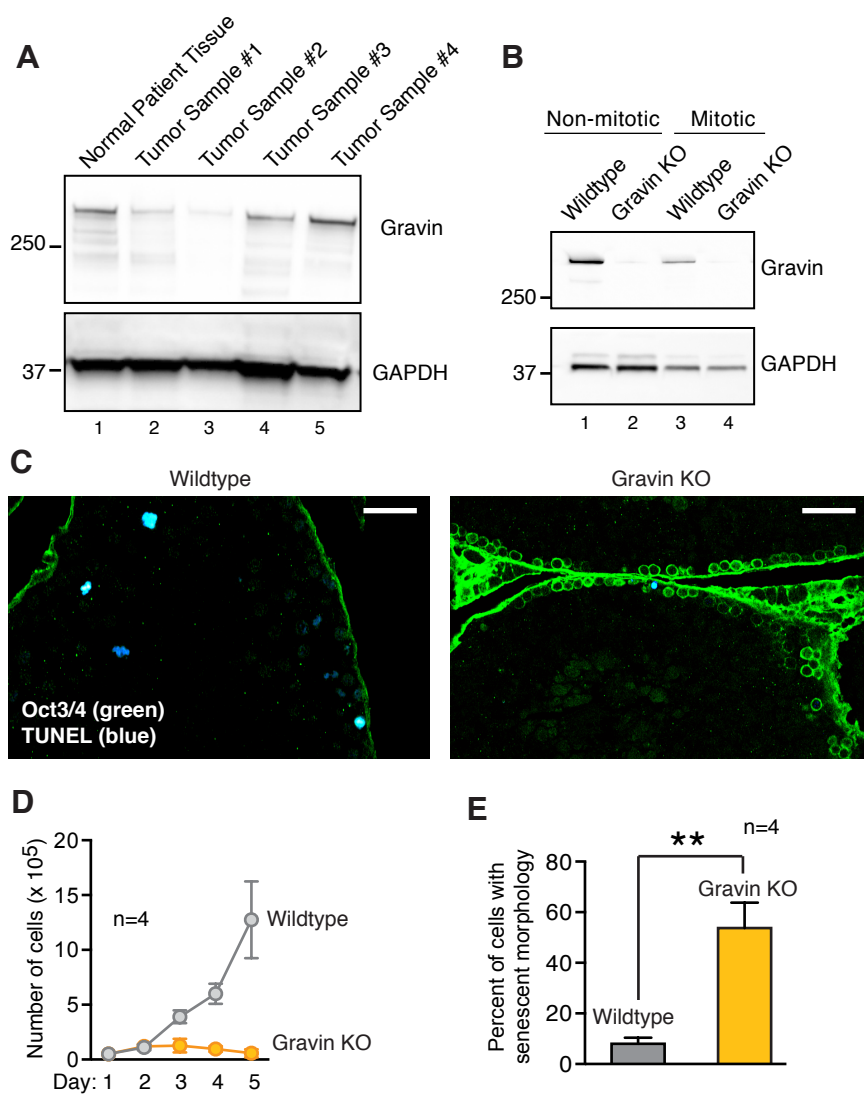

**Figure 1- figure supplement 1.**

Supplement: supp [file elife-09384-supp-v1.zip › elife_poa_e09384_Figure_1_figure_supplement_1.pdf]

**A**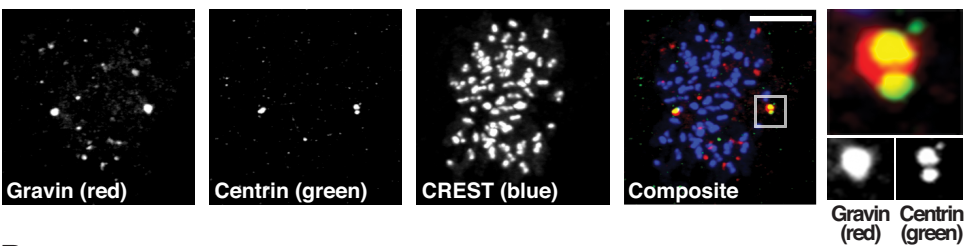**B**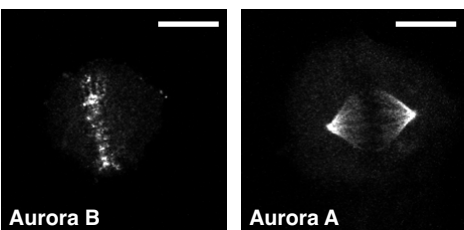**C**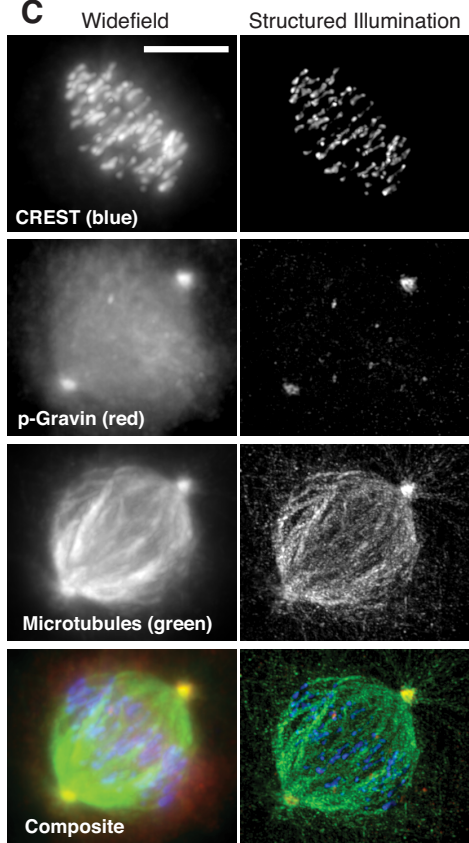**D**

Structured Illumination Microscopy

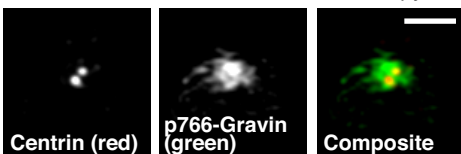**Figure 2 - figure supplement 1**

Supplement: supp [file elife-09384-supp-v1.zip › elife_poa_e09384_Figure_2_figure_supplement_1.pdf]

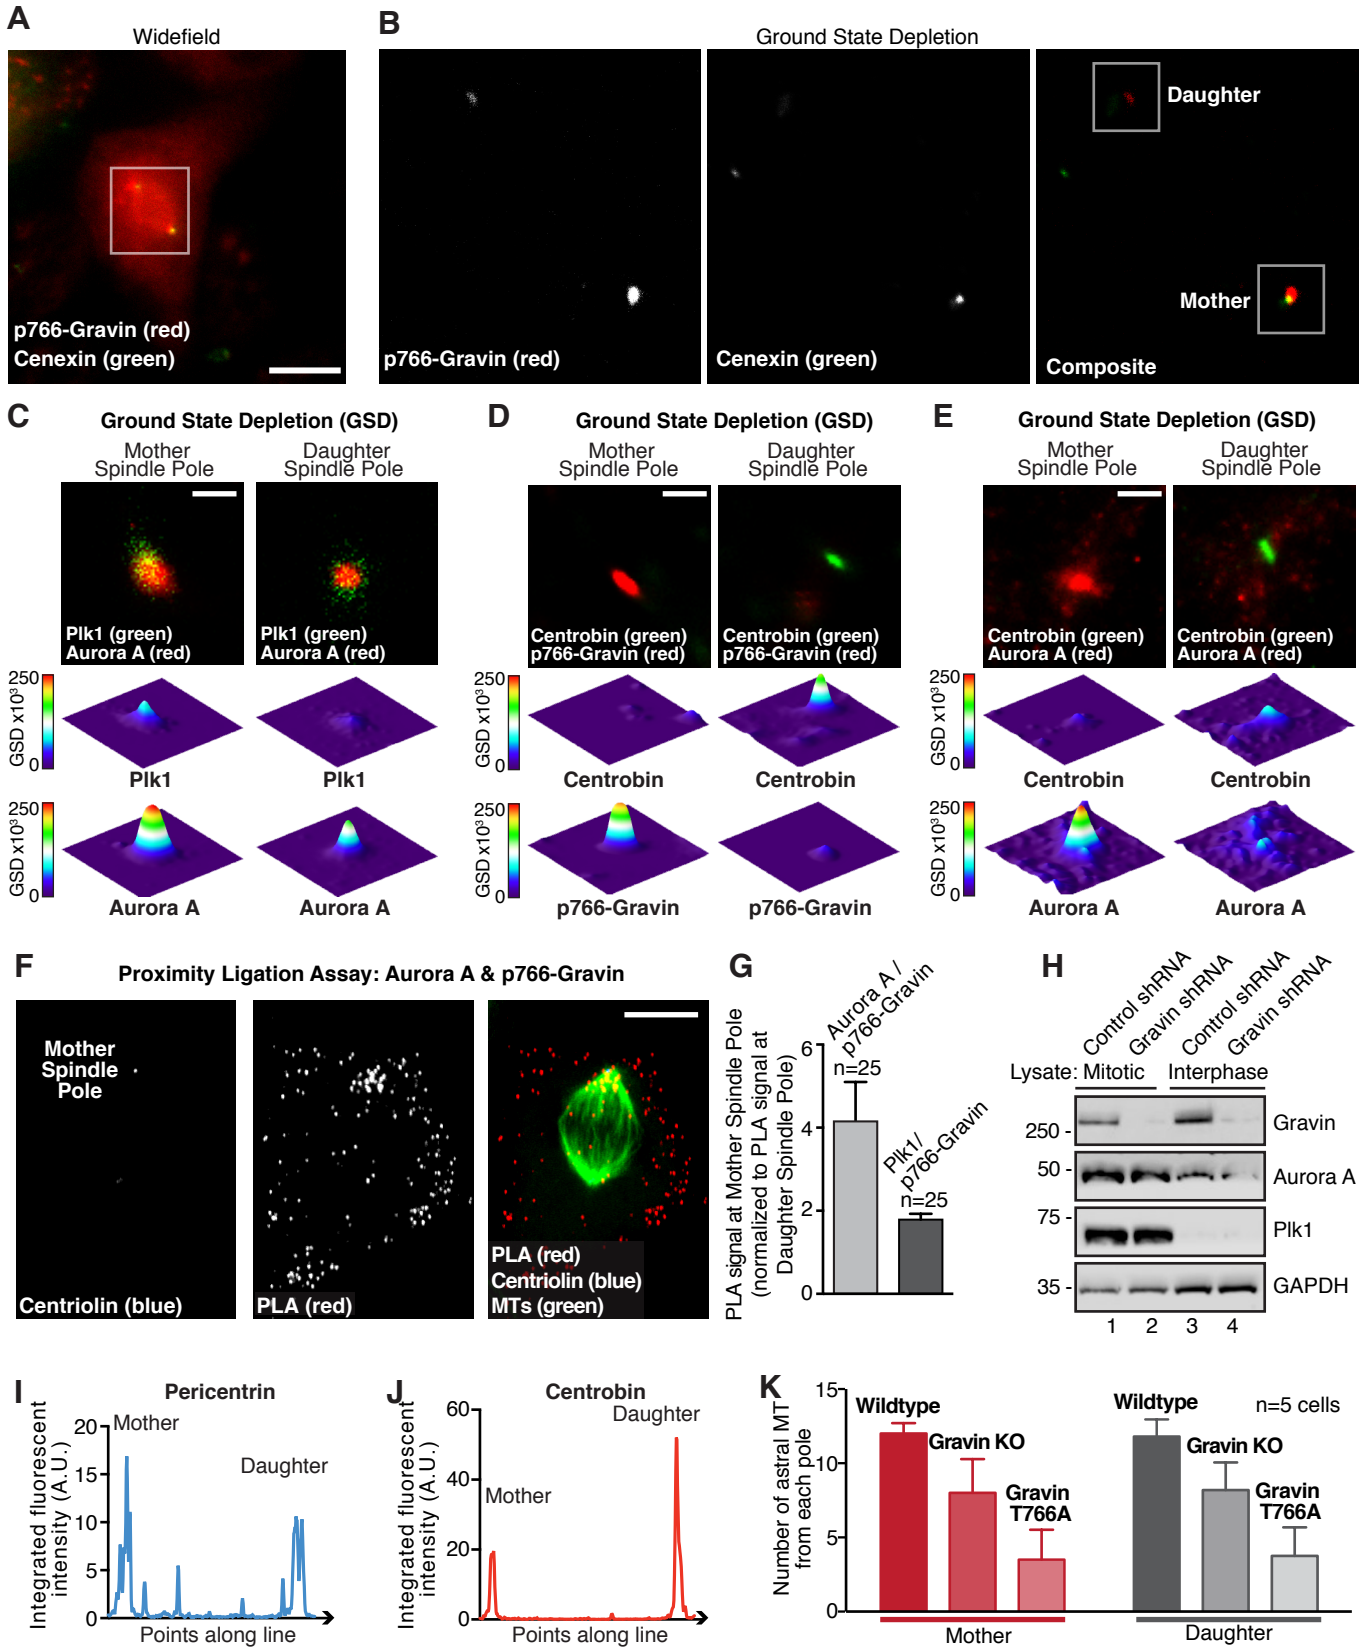

Figure 4 - figure supplement 1

Supplement: supp [file elife-09384-supp-v1.zip › elife_poa_e09384_Figure_4_figure_supplement_1.pdf]
